# Supplementary material for: Differences between serum polar lipid profiles of male and female rheumatoid arthritis patients in response to glucocorticoid treatment
Source: Springer Nature journal article supplement (doi:10.1007/s10787-016-0284-1), 2016-09-28
Supplement: MOESM1 [file 10780976]

## **Electronic supplementary material**

**Journal: Inflammopharmacology**

### **Differences between serum polar lipid profile of male and female rheumatoid arthritis patients in response to glucocorticoid treatment**

Junzeng Fu \*, Bart V.J. Cuppen, Paco M.J. Welsing, Herman van Wietmarschen, Amy C. Harms, Ruud Berger, Slavik Koval, Ruth D.E. Fritsch-Stork, Johannes W.J. Bijlsma, Thomas Hankemeier, Jan van der Greef, and Floris P.J.G. Lafeber

**\*Corresponding author:** E-mail: [j.fu@lacdr.leidenuniv.nl](mailto:j.fu@lacdr.leidenuniv.nl); Leiden Academic Center for Drug Research, Leiden University, Leiden, the Netherlands (J. Fu)

### **Method—lipidomics profiling**

For the detection of polar lipids, each 20  $\mu\text{L}$  serum was spiked with internal standard (ISTD) mix and lipids were extracted by 440  $\mu\text{L}$  methanol. After centrifugation, the supernatant was transferred to an Eppendorf tube and the solvent was evaporated using a Speedvac. The dried lipids were reconstituted in 145  $\mu\text{L}$  isopropanol, 0.1% formic acid and transferred to autosampler vials. In total 8  $\mu\text{L}$  was injected into ultra-performance liquid chromatography coupled to electrospray ionization-quadrupole time-of-flight (Agilent 6530 San Jose, A, USA) with an ACQUITY UPLC™ HSS T3 column (1.8  $\mu\text{m}$ , 2.1 $\times$ 100mm). Lipids were detected in full scan in the negative mode.

## Figures

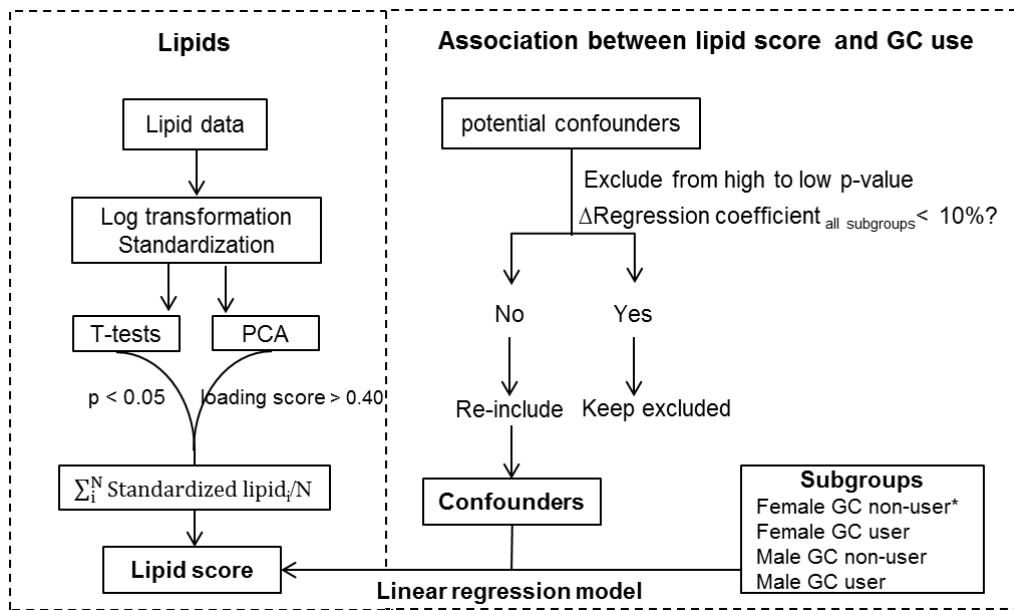

Fig S1. A schematic overview of the statistical analyses. \* the subgroup "Female-GC non-user" is set as the reference group in the linear regression analysis.

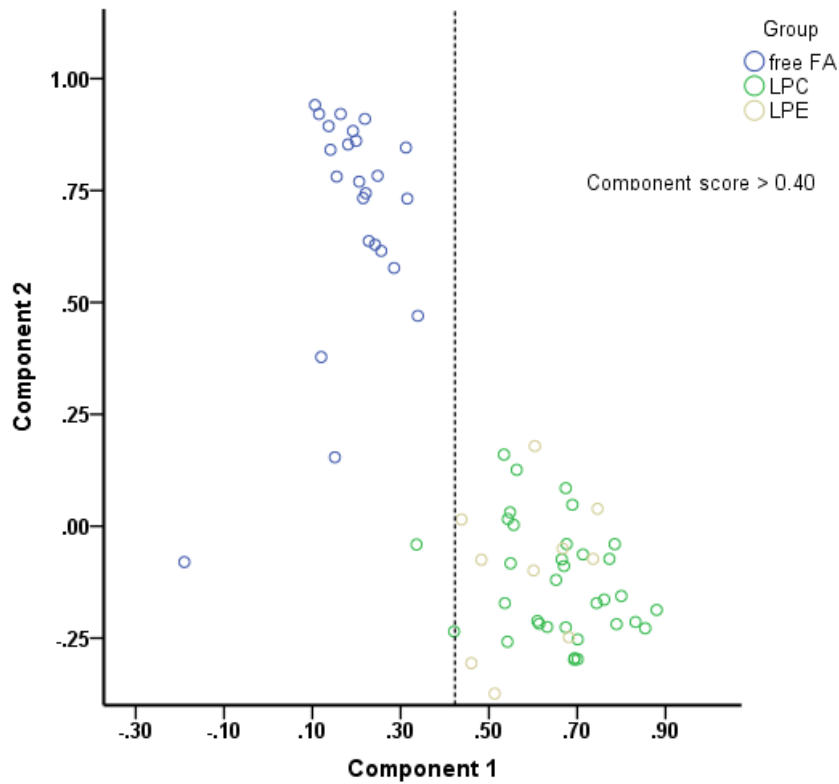

Fig. S2 Graphical representation of loading scores of 68 lipids in component 1 and 2 by PCA analysis. All the lysophospholipids (green and yellow circles) are with loading scores  $> 0.40$  in component 1 (on the right side of the dash line). FA: fatty acid; LPC: lysophosphatidylcholines; LPE: lysophosphatidylethanolamines .

**Table S1.** Baseline characteristics of patients in the cohort (n=281), split for GC non-users and users, females and males.

| Item                                                            | Females                |                   | Males                 |                   | p-value          |
|-----------------------------------------------------------------|------------------------|-------------------|-----------------------|-------------------|------------------|
|                                                                 | GC non-users (n = 136) | GC users (n = 77) | GC non-users (n = 26) | GC users (n = 42) |                  |
| Age, years, mean $\pm$ SD <sup>a</sup>                          | 53.2 $\pm$ 12.8        | 53.8 $\pm$ 14.1   | 54.2 $\pm$ 12.2       | 57.0 $\pm$ 11.7   | 0.428            |
| Body mass index, kg/m <sup>2</sup> , mean $\pm$ SD <sup>a</sup> | 27.2 $\pm$ 5.8         | 27.0 $\pm$ 5.2    | 26.7 $\pm$ 3.4        | 25.0 $\pm$ 3.2    | 0.115            |
| Current smoker, n (%) <sup>b</sup>                              | 28 (20.6)              | 11 (14.3)         | 12 (46.2)             | 19 (45.2)         | <b>&lt;0.001</b> |
| Positive RF, n (%) <sup>b</sup>                                 | 91 (66.9)              | 38 (49.4)         | 15 (57.7)             | 34 (81.0)         | <b>0.004</b>     |
| Positive ACPA, n (%) <sup>b</sup>                               | 90 (66.2)              | 49 (63.6)         | 17 (65.4)             | 31 (73.8)         | 0.726            |
| CRP, mg/dL, median (IQR) <sup>c</sup>                           | 6.0 (2.7-15.0)         | 5.0 (3.0-16.5)    | 5.5 (2.3-12.0)        | 10 (2.3-35.3)     | 0.487            |
| Use of other DMARDs, n (%) <sup>b</sup>                         |                        |                   |                       |                   |                  |
| Methotrexate, n (%) <sup>b</sup>                                | 99 (72.8)              | 48 (62.3)         | 22 (84.6)             | 32 (76.2)         | 0.115            |
| Leflunomide, n (%) <sup>b</sup>                                 | 17 (12.5)              | 9 (11.7)          | 2 (7.7)               | 7 (16.7)          | 0.737            |
| Hydroxychloroquine, n (%) <sup>b</sup>                          | 21 (15.4)              | 22 (28.6)         | 9 (34.6)              | 10 (23.8)         | 0.050            |
| Use of non-DMARDs                                               |                        |                   |                       |                   |                  |
| NSAIDs, n (%) <sup>b</sup>                                      | 94 (69.1)              | 39 (50.6)         | 20 (76.9)             | 22 (52.4)         | <b>0.010</b>     |
| Anticoncepcion, n (%) <sup>b</sup>                              | 10 (7.4)               | 5 (6.5)           | 0 (0.0)               | 0 (0.0)           | 0.162            |
| Antidiabetics, n (%) <sup>b</sup>                               | 5 (3.7)                | 4 (5.2)           | 1 (3.8)               | 1 (2.4)           | 0.892            |
| Antihyperlipedemia, n (%) <sup>b</sup>                          | 18 (13.2)              | 13 (16.9)         | 6 (23.1)              | 1 (2.4)           | 0.065            |
| Bisphosphonates, n (%) <sup>b</sup>                             | 34 (25.0)              | 58 (75.3)         | 3 (11.5)              | 30 (71.4)         | <b>&lt;0.001</b> |
| DAS28, mean $\pm$ SD <sup>a</sup>                               | 4.6 $\pm$ 1.2          | 4.6 $\pm$ 1.2     | 3.9 $\pm$ 1.1         | 4.4 $\pm$ 1.4     | 0.071            |
| TJC, median (IQR) <sup>c</sup>                                  | 8.0 (2.3-12.0)         | 7.0 (2.0-15.0)    | 4.0 (1.0-6.3)         | 6.0 (0.0-14.0)    | 0.069            |
| SJC, median (IQR) <sup>c</sup>                                  | 2.0 (0.0-4.0)          | 2.0 (0.0-4.0)     | 1.0 (0.0-3.0)         | 1.0 (0.0-4.3)     | 0.885            |
| VAS-GH, mean $\pm$ SD <sup>a</sup>                              | 58.6 $\pm$ 24.2        | 56.4 $\pm$ 22.7   | 49.2 $\pm$ 25.1       | 57.1 $\pm$ 23.3   | 0.324            |
| ESR, mm/h, median (IQR) <sup>c</sup>                            | 19.0 (11.0-37.0)       | 22.0 (6.5-39.0)   | 15.5 (6.0-34.3)       | 19.0 (9.5-47.5)   | 0.786            |

P-values for comparisons among four subgroups were calculated by one-way ANOVA <sup>a</sup>, Chi-square tests <sup>b</sup>, and Kruskal wallis H tests <sup>c</sup>) based on distribution of the clinical parameter. Bold values indicate significant p-values (p < 0.05).

ACPA: anti citrullinated protein antibody, RF: c-reactive protein, DAS28: disease activity score based on a 28-joint count, DMARDs: disease-modifying antirheumatic drugs, ESR: erythrocyte sedimentation rate, IQR: interquartile range, NSAID: non-steroid anti-inflammatory drug, RF: rheumatoid factor, SD: standard deviation, SJC: swollen joint count, TJC: tender joint count, VAS-GH: visual analogue scale-general health.

**Table S2.** List of detected metabolites in lipidomics profiling

| Lipid Class                                              | Lipid Maps | Metabolite species                                                                                                                                                                                                                                                                                                                                                               | Amount (n) |
|----------------------------------------------------------|------------|----------------------------------------------------------------------------------------------------------------------------------------------------------------------------------------------------------------------------------------------------------------------------------------------------------------------------------------------------------------------------------|------------|
| Free fatty acids (FA)                                    | FA01       | C14:0, C14:1, C15:0, C16:0, C16:1, C17:0, C17:1, C18:0, C18:1, C18:2, C18:3- $\omega$ 3/ $\omega$ 6, C20:0, C20:1, C20:2, C20:3- $\omega$ 3/ $\omega$ 6, C20:3- $\omega$ 9, C20:4- $\omega$ 6, C20:5- $\omega$ 3, C22:4, C22:5- $\omega$ 3, C22:5- $\omega$ 6, C22:6, C24:0, C24:1                                                                                               | 24         |
| Lysophosphatidylcholine (LPC)                            | GP0105     | <i>sn1</i> : C14:0, C15:0, C16:0, C16:1, C18:0, C18:1, C18:2, C18:3- $\omega$ 3/ $\omega$ 6, C19:0, C20:1, C20:2, C20:3- $\omega$ 3/ $\omega$ 6, C20:3- $\omega$ 9, C20:4, C20:5, C22:4, C22:5- $\omega$ 3, C22:5- $\omega$ 6, C22:6<br><i>sn2</i> : C14:0, C16:0, C16:1, C18:0, C18:1, C18:2, C18:3- $\omega$ 3/ $\omega$ 6, C20:3- $\omega$ 3/ $\omega$ 6, C20:4, C20:5, C22:6 | 30         |
| Lysophosphatidylethanolamine (LPE)                       | GP0205     | C16:0, C18:0, C18:1, C18:2, C20:3- $\omega$ 3/ $\omega$ 6, C20:4, C20:5, C22:5- $\omega$ 3, C22:5- $\omega$ 6, C22:6                                                                                                                                                                                                                                                             | 10         |
| Plasmalogen Lysophosphatidylcholine (LPC-O) <sup>a</sup> | GP0106     | C16:0; C18:0; C18:1; C18:2                                                                                                                                                                                                                                                                                                                                                       | 4          |

The "*sn1*-" or "*sn2*-" prefix is used to indicate the position of the fatty acid chain esterified to the glycerol backbone of a lysophosphatidylcholine.

<sup>a</sup> The 'LPC-O' is used to identify a plasmalogen lysophosphatidylcholine, where the fatty acid chain is attached via a vinyl ether linkage to the glycerol backbone. The ' $\omega$ 3', ' $\omega$ 6', ' $\omega$ 9' are used to indicate double bond (C=C) at the third, sixth or ninth carbon atom from the end of the fatty acid chain.

**Table S3.** Differences in 68 serum lipid levels between GC users and non-users in males and females, respectively. The mean differences between GC non-users and users are shown. *P*-values were calculated by means of an independent sample t-test.

| Metabolite name                                | Males<br>(GC user vs. GC non-user)             |         | Females<br>(GC user vs. GC non-user)           |         |
|------------------------------------------------|------------------------------------------------|---------|------------------------------------------------|---------|
|                                                | Mean <sub>non-user</sub> -Mean <sub>user</sub> | p value | Mean <sub>non-user</sub> -Mean <sub>user</sub> | p value |
| <i>sn1</i> -LPC (14:0)                         | -0.106                                         | 0.602   | -0.444                                         | 0.001   |
| <i>sn1</i> -LPC (15:0)                         | -0.116                                         | 0.633   | -0.346                                         | 0.010   |
| <i>sn1</i> -LPC (16:0)                         | 0.027                                          | 0.796   | -0.301                                         | <0.001  |
| <i>sn1</i> -LPC (16:1)                         | -0.181                                         | 0.422   | -0.507                                         | <0.001  |
| <i>sn1</i> -LPC (18:0)                         | 0.289                                          | 0.122   | -0.148                                         | 0.304   |
| <i>sn1</i> -LPC (18:1)                         | -0.091                                         | 0.512   | -0.368                                         | <0.001  |
| <i>sn1</i> -LPC (18:2)                         | -0.283                                         | 0.027   | -0.332                                         | <0.001  |
| <i>sn1</i> -LPC (18:3- $\omega$ 3/ $\omega$ 6) | -0.343                                         | 0.077   | -0.393                                         | 0.004   |
| <i>sn1</i> -LPC (19:0)                         | 0.252                                          | 0.153   | 0.091                                          | 0.494   |
| <i>sn1</i> -LPC (20:1)                         | 0.120                                          | 0.568   | -0.207                                         | 0.099   |
| <i>sn1</i> -LPC (20:2)                         | -0.153                                         | 0.408   | -0.395                                         | 0.004   |
| <i>sn1</i> -LPC (20:3- $\omega$ 3/ $\omega$ 6) | 0.152                                          | 0.342   | -0.226                                         | 0.054   |
| <i>sn1</i> -LPC (20:3- $\omega$ 9)             | 0.284                                          | 0.276   | -0.198                                         | 0.144   |
| <i>sn1</i> -LPC (20:4)                         | 0.183                                          | 0.244   | -0.2                                           | 0.032   |
| <i>sn1</i> -LPC (20:5)                         | -0.417                                         | 0.062   | -0.237                                         | 0.074   |
| <i>sn1</i> -LPC (22:4)                         | 0.228                                          | 0.359   | -0.283                                         | 0.047   |
| <i>sn1</i> -LPC (22:5- $\omega$ 3)             | -0.161                                         | 0.369   | -0.373                                         | 0.007   |
| <i>sn1</i> -LPC (22:5- $\omega$ 6)             | 0.357                                          | 0.128   | -0.099                                         | 0.455   |
| <i>sn1</i> -LPC (22:6)                         | 0.107                                          | 0.610   | -0.021                                         | 0.882   |
| <i>sn2</i> -LPC (14:0)                         | -0.157                                         | 0.405   | -0.427                                         | 0.001   |
| <i>sn2</i> -LPC (16:0)                         | 0.178                                          | 0.341   | -0.501                                         | <0.001  |
| <i>sn2</i> -LPC (16:1)                         | -0.237                                         | 0.308   | -0.487                                         | <0.001  |
| <i>sn2</i> -LPC (18:0)                         | 0.211                                          | 0.098   | -0.115                                         | 0.231   |
| <i>sn2</i> -LPC (18:1)                         | -0.114                                         | 0.559   | -0.443                                         | <0.001  |
| <i>sn2</i> -LPC (18:2)                         | -0.395                                         | 0.052   | -0.533                                         | <0.001  |
| <i>sn2</i> -LPC (18:3- $\omega$ 3/ $\omega$ 6) | -0.362                                         | 0.161   | -0.411                                         | 0.001   |
| <i>sn2</i> -LPC (20:3- $\omega$ 3/ $\omega$ 6) | 0.226                                          | 0.281   | -0.263                                         | 0.062   |
| <i>sn2</i> -LPC (20:4)                         | 0.215                                          | 0.384   | -0.331                                         | 0.021   |
| <i>sn2</i> -LPC (20:5)                         | -0.421                                         | 0.075   | -0.278                                         | 0.046   |
| <i>sn2</i> -LPC (22:6)                         | 0.092                                          | 0.666   | -0.07                                          | 0.616   |
| LPC (O-16:0)                                   | 0.157                                          | 0.466   | -0.343                                         | 0.020   |
| LPC (O-18:0)                                   | -0.019                                         | 0.928   | -0.419                                         | 0.003   |
| LPC (O-18:1)                                   | 0.190                                          | 0.410   | -0.152                                         | 0.299   |
| LPC (O-18:2)                                   | 0.080                                          | 0.707   | -0.398                                         | 0.004   |
| LPE (16:0)                                     | -0.279                                         | 0.143   | -0.505                                         | 0.001   |
| LPE (18:0)                                     | -0.102                                         | 0.588   | -0.587                                         | <0.001  |
| LPE (18:1)                                     | 0.031                                          | 0.883   | -0.449                                         | 0.001   |
| LPE (18:2)                                     | -0.349                                         | 0.093   | -0.497                                         | <0.001  |
| LPE (20:3- $\omega$ 3/ $\omega$ 6)             | -0.051                                         | 0.789   | -0.469                                         | 0.001   |
| LPE (20:4)                                     | -0.062                                         | 0.785   | -0.685                                         | <0.001  |
| LPE (20:5)                                     | -0.463                                         | 0.029   | -0.352                                         | 0.012   |
| LPE (22:5- $\omega$ 3)                         | -0.328                                         | 0.089   | -0.694                                         | <0.001  |

|                                   |        |       |        |       |
|-----------------------------------|--------|-------|--------|-------|
| LPE (22:5- $\omega$ 6)            | 0.294  | 0.215 | -0.356 | 0.009 |
| LPE (22:6)                        | -0.242 | 0.218 | -0.512 | 0.001 |
| FA (14:0)                         | 0.089  | 0.654 | -0.014 | 0.924 |
| FA (14:1)                         | 0.038  | 0.865 | 0.159  | 0.275 |
| FA (15:0)                         | 0.129  | 0.517 | -0.027 | 0.855 |
| FA (16:0)                         | -0.083 | 0.680 | -0.006 | 0.966 |
| FA (16:1)                         | 0.113  | 0.600 | 0.042  | 0.770 |
| FA (17:0)                         | -0.097 | 0.652 | -0.057 | 0.692 |
| FA (17:1)                         | 0.041  | 0.852 | 0.023  | 0.872 |
| FA (18:0)                         | -0.072 | 0.725 | 0.109  | 0.456 |
| FA (18:1)                         | 0.134  | 0.551 | 0.075  | 0.609 |
| FA (18:2)                         | 0.089  | 0.689 | 0.035  | 0.805 |
| FA (18:3- $\omega$ 3/ $\omega$ 6) | 0.190  | 0.364 | 0.009  | 0.950 |
| FA (20:0)                         | 0.039  | 0.878 | -0.071 | 0.620 |
| FA (20:1)                         | 0.054  | 0.803 | -0.013 | 0.925 |
| FA (20:2)                         | 0.011  | 0.969 | -0.042 | 0.761 |
| FA (20:3- $\omega$ 3/ $\omega$ 6) | 0.377  | 0.109 | -0.107 | 0.445 |
| FA (20:3- $\omega$ 9)             | 0.500  | 0.021 | -0.074 | 0.595 |
| FA (20:4- $\omega$ 6)             | 0.250  | 0.212 | -0.013 | 0.905 |
| FA (20:5- $\omega$ 3)             | -0.105 | 0.628 | -0.098 | 0.463 |
| FA (22:4)                         | 0.237  | 0.234 | -0.077 | 0.543 |
| FA (22:5- $\omega$ 3)             | -0.032 | 0.866 | -0.143 | 0.271 |
| FA (22:5- $\omega$ 6)             | 0.247  | 0.261 | 0.017  | 0.901 |
| FA (22:6)                         | 0.371  | 0.107 | 0.072  | 0.585 |
| FA (24:0)                         | 0.071  | 0.783 | 0.028  | 0.838 |
| FA (24:1)                         | -0.013 | 0.951 | 0.016  | 0.901 |



**Table S4.** Loading scores of 68 lipids in principle components analysis. Component loading scores of all lipids were presented for the first five components (with eigenvalue >1). Since the LPCs and LPEs showed high component loadings in one component (the first) and only with positive values, they all highly correlate in the same direction. Considering all LPCs and LPEs significantly different between GC users and non-users, all loading scores were  $\geq 0.438$ .

| Metabolite name                                  | Component |        |        |        |        |
|--------------------------------------------------|-----------|--------|--------|--------|--------|
|                                                  | 1         | 2      | 3      | 4      | 5      |
| <i>sn1</i> -LPC (14:0)*                          | 0.701     | -0.253 | 0.057  | 0.147  | -0.357 |
| <i>sn1</i> -LPC (15:0)*                          | 0.610     | -0.212 | -0.159 | 0.053  | -0.066 |
| <i>sn1</i> -LPC (16:0)*                          | 0.880     | -0.187 | -0.077 | -0.080 | -0.009 |
| <i>sn1</i> -LPC (16:1)*                          | 0.773     | -0.073 | 0.152  | 0.044  | -0.319 |
| <i>sn1</i> -LPC (18:0)*                          | 0.744     | -0.172 | -0.249 | -0.082 | 0.295  |
| <i>sn1</i> -LPC (18:1)*                          | 0.854     | -0.228 | 0.023  | 0.131  | 0.135  |
| <i>sn1</i> -LPC (18:2)*                          | 0.701     | -0.297 | -0.036 | 0.181  | 0.429  |
| <i>sn1</i> -LPC (18:3- $\omega$ 3/ $\omega$ 6)*  | 0.694     | -0.295 | 0.047  | 0.344  | -0.100 |
| <i>sn1</i> -LPC (19:0)                           | 0.421     | -0.235 | -0.315 | -0.029 | 0.291  |
| <i>sn1</i> -LPC (20:1)                           | 0.336     | -0.041 | -0.252 | -0.132 | 0.203  |
| <i>sn1</i> -LPC (20:2)*                          | 0.800     | -0.156 | 0.126  | -0.108 | 0.108  |
| <i>sn1</i> -LPC (20:3- $\omega$ 3/ $\omega$ 6)   | 0.665     | -0.074 | 0.404  | -0.312 | -0.133 |
| <i>sn1</i> -LPC (20:3- $\omega$ 9)               | 0.652     | -0.120 | 0.345  | -0.165 | -0.213 |
| <i>sn1</i> -LPC (20:4)*                          | 0.674     | 0.085  | 0.154  | -0.492 | 0.032  |
| <i>sn1</i> -LPC (20:5)                           | 0.543     | 0.016  | -0.668 | 0.069  | -0.296 |
| <i>sn1</i> -LPC (22:4)*                          | 0.676     | -0.040 | 0.539  | -0.326 | 0.026  |
| <i>sn1</i> -LPC (22:5- $\omega$ 3)*              | 0.785     | -0.040 | -0.219 | -0.022 | 0.014  |
| <i>sn1</i> -LPC (22:5- $\omega$ 6)               | 0.556     | 0.003  | 0.569  | -0.405 | -0.068 |
| <i>sn1</i> -LPC (22:6)                           | 0.534     | 0.160  | -0.574 | -0.254 | -0.084 |
| <i>sn2</i> -LPC (14:0)*                          | 0.674     | -0.226 | 0.057  | 0.173  | -0.343 |
| <i>sn2</i> -LPC (16:0)*                          | 0.832     | -0.214 | -0.050 | -0.057 | -0.051 |
| <i>sn2</i> -LPC (16:1)*                          | 0.713     | -0.063 | 0.183  | 0.026  | -0.314 |
| <i>sn2</i> -LPC (18:0)                           | 0.761     | -0.164 | -0.235 | -0.079 | 0.283  |
| <i>sn2</i> -LPC (18:1)*                          | 0.789     | -0.219 | 0.037  | 0.112  | 0.121  |
| <i>sn2</i> -LPC (18:2)*                          | 0.693     | -0.298 | -0.018 | 0.160  | 0.439  |
| <i>sn2</i> -LPC (18:3- $\omega$ 3/ $\omega$ 6) * | 0.614     | -0.218 | 0.049  | 0.322  | -0.104 |
| <i>sn2</i> -LPC (20:3- $\omega$ 3/ $\omega$ 6)   | 0.670     | -0.089 | 0.385  | -0.302 | -0.079 |
| <i>sn2</i> -LPC (20:4)*                          | 0.689     | 0.048  | 0.175  | -0.463 | 0.024  |
| <i>sn2</i> -LPC (20:5)*                          | 0.548     | 0.031  | -0.643 | 0.089  | -0.315 |
| <i>sn2</i> -LPC (22:6)                           | 0.563     | 0.126  | -0.551 | -0.251 | -0.070 |
| LPC (O-16:0)*                                    | 0.632     | -0.225 | -0.219 | -0.301 | 0.408  |
| LPC (O-18:0)*                                    | 0.542     | -0.258 | -0.252 | -0.242 | 0.411  |
| LPC (O-18:1)*                                    | 0.536     | -0.172 | -0.241 | -0.290 | 0.544  |
| LPC (O-18:2)*                                    | 0.549     | -0.083 | -0.283 | -0.209 | 0.406  |
| LPE (16:0)*                                      | 0.681     | -0.248 | 0.066  | 0.176  | -0.278 |
| LPE (18:0)*                                      | 0.746     | 0.039  | 0.082  | 0.184  | -0.072 |
| LPE (18:1)*                                      | 0.460     | -0.306 | 0.210  | 0.558  | 0.173  |
| LPE (18:2)*                                      | 0.513     | -0.374 | 0.219  | 0.588  | 0.217  |
| LPE (20:3- $\omega$ 3/ $\omega$ 6)*              | 0.601     | -0.099 | 0.512  | 0.237  | -0.167 |

|                                                            |        |        |        |        |        |
|------------------------------------------------------------|--------|--------|--------|--------|--------|
| <b>LPE (20:4)*</b>                                         | 0.667  | -0.050 | 0.375  | 0.126  | 0.044  |
| <b>LPE (20:5)*</b>                                         | 0.483  | -0.075 | -0.496 | 0.458  | -0.328 |
| <b>LPE (22:5-<math>\omega</math>3)*</b>                    | 0.736  | -0.073 | 0.161  | 0.340  | -0.156 |
| <b>LPE (22:5-<math>\omega</math>6)*</b>                    | 0.438  | 0.015  | 0.672  | -0.080 | -0.177 |
| <b>LPE (22:6)*</b>                                         | 0.604  | 0.179  | -0.323 | 0.128  | -0.235 |
| <b>FA (14:0)</b>                                           | 0.192  | 0.883  | 0.066  | 0.221  | -0.006 |
| <b>FA (14:1)</b>                                           | 0.141  | 0.841  | 0.023  | 0.089  | -0.061 |
| <b>FA (15:0)</b>                                           | 0.215  | 0.733  | 0.102  | 0.210  | 0.065  |
| <b>FA (16:0)</b>                                           | 0.206  | 0.770  | 0.190  | 0.294  | 0.183  |
| <b>FA (16:1)</b>                                           | 0.164  | 0.921  | 0.067  | 0.020  | 0.000  |
| <b>FA (17:0)</b>                                           | 0.221  | 0.744  | 0.069  | 0.239  | 0.151  |
| <b>FA (17:1)</b>                                           | 0.219  | 0.910  | 0.031  | 0.068  | 0.043  |
| <b>FA (18:0)</b>                                           | 0.120  | 0.378  | 0.218  | 0.392  | 0.259  |
| <b>FA (18:1)</b>                                           | 0.106  | 0.941  | 0.057  | 0.073  | 0.130  |
| <b>FA (18:2)</b>                                           | 0.137  | 0.894  | 0.012  | 0.087  | 0.206  |
| <b>FA (18:3-<math>\omega</math>3/<math>\omega</math>6)</b> | 0.181  | 0.853  | -0.044 | 0.183  | 0.119  |
| <b>FA (20:0)</b>                                           | 0.151  | 0.154  | 0.105  | 0.336  | 0.209  |
| <b>FA (20:1)</b>                                           | 0.115  | 0.921  | -0.029 | 0.071  | 0.160  |
| <b>FA (20:2)</b>                                           | 0.155  | 0.781  | 0.008  | -0.129 | 0.112  |
| <b>FA (20:3-<math>\omega</math>3/<math>\omega</math>6)</b> | 0.315  | 0.732  | 0.216  | -0.184 | -0.111 |
| <b>FA (20:3-<math>\omega</math>9)*</b>                     | 0.285  | 0.577  | 0.152  | -0.208 | -0.124 |
| <b>FA (20:4-<math>\omega</math>6)</b>                      | 0.256  | 0.615  | -0.019 | -0.349 | 0.074  |
| <b>FA (20:5-<math>\omega</math>3)</b>                      | 0.339  | 0.470  | -0.686 | 0.085  | -0.244 |
| <b>FA (22:4)</b>                                           | 0.199  | 0.861  | 0.266  | -0.164 | -0.002 |
| <b>FA (22:5-<math>\omega</math>3)</b>                      | 0.312  | 0.846  | -0.275 | 0.076  | -0.065 |
| <b>FA (22:5-<math>\omega</math>6)</b>                      | 0.248  | 0.783  | 0.271  | -0.237 | -0.142 |
| <b>FA (22:6)</b>                                           | 0.242  | 0.629  | -0.494 | -0.076 | -0.163 |
| <b>FA (24:0)</b>                                           | -0.190 | -0.080 | 0.319  | 0.392  | 0.553  |
| <b>FA (24:1)</b>                                           | 0.228  | 0.637  | -0.163 | 0.125  | 0.118  |

\* Metabolites were also significantly different in independent t-tests between GC users and non-users, in either females or males (Figure 1, Table S3).

**Table S5.** The final regression model investigating the association between gender and GC use on the lysophospholipid score.

| <b>Variables</b>                                 | <b>Coefficients <sup>a</sup></b> | <b>95%-confidence interval</b> | <b>p value</b> |
|--------------------------------------------------|----------------------------------|--------------------------------|----------------|
| <b>Male patients no GC use (reference group)</b> | 0.149                            | (-0.491 to 0.789)              | 0.649          |
| <b>Male patients GC use</b>                      | 0.122                            | (-0.160 to 0.405)              | 0.397          |
| <b>Female patients no GC use</b>                 | -0.310                           | (-0.604 to -0.015)             | 0.041          |
| <b>Female patients GC use</b>                    | 0.089                            | (-0.212 to 0.390)              | 0.565          |
| <b>Age</b>                                       | 0.001                            | (-0.008 to 0.007)              | 0.937          |
| <b>Menopausal status</b>                         | 0.286                            | (0.053 to 0.519)               | 0.017          |
| <b>BMI (kg/m<sup>2</sup>)</b>                    | 0.006                            | (-0.009 to 0.020)              | 0.447          |
| <b>RF positivity</b>                             | -0.247                           | (-0.432 to -0.063)             | 0.009          |
| <b>ACPA positivity</b>                           | 0.182                            | (-0.008 to 0.372)              | 0.061          |
| <b>CRP (log transformed, mg/dL)</b>              | -0.122                           | (-0.192 to -0.052)             | 0.001          |
| <b>ESR (log transformed, mm/h)</b>               | 0.058                            | (-0.031 to 0.147)              | 0.202          |
| <b>DAS28</b>                                     | -0.014                           | (-0.078 to 0.050)              | 0.663          |
| <b>Concomitant methotrexate</b>                  | -0.023                           | (-0.181 to 0.134)              | 0.773          |
| <b>Concomitant hydroxychloroquin</b>             | -0.180                           | (-0.347 to -0.013)             | 0.035          |
| <b>Antidiabetics</b>                             | -0.132                           | (-0.493 to 0.229)              | 0.474          |
| <b>NSAIDs</b>                                    | -0.068                           | (-0.215 to 0.078)              | 0.362          |

<sup>a</sup> Coefficients indicate the changes in mean lysophospholipid score after correcting for confounders—BMI, menopausal status, RF positive, log-transformed CRP, log transformed ESR, DAS28, and concomitant drugs (methotrexate, hydroxychloroquine, anti-diabetic drug and NSAIDs). BMI: body mass index; CRP: C-reactive protein; GC: glucocorticoid; RF: rheumatoid factor; ACPA: anti citrullinated protein antibody; ESR: erythrocyte sedimentation rate; DAS28: disease activity score based on a 28-joint count; NSAIDs: non-steroid anti-inflammatory drugs
